# Supplementary material
Source: PubMed Central journal article supplement (PMC3972488)
Supplement: NIHMS566527-supplement-1.pdf [file NIHMS566527-supplement-1.pdf]

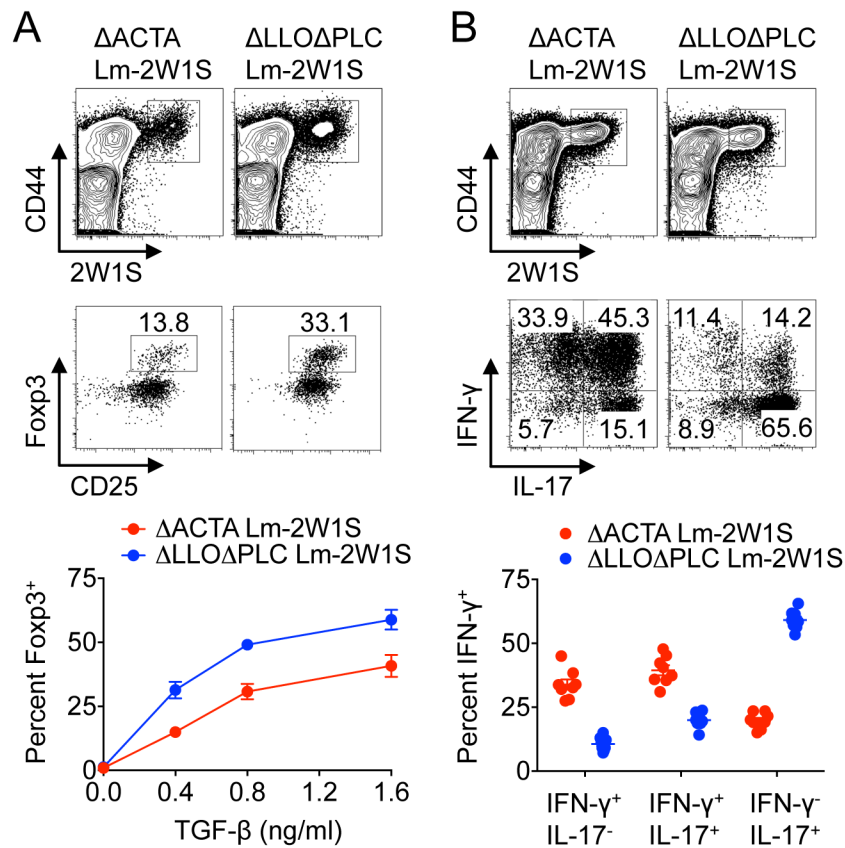

**Supplemental Figure 1.** Lm cytoplasmic entry primes Th1 CD4<sup>+</sup> T cells resilient against subsequent Treg or Th17 differentiation. **(A)** Representative plots and cumulative data illustrating percent Foxp3<sup>+</sup> among 2W1S<sup>+</sup> CD4<sup>+</sup> T cells 60 days after infection with each recombinant Lm, and stimulation with 2W1S<sub>55-68</sub> peptide, IL-2 and each concentration of TGF- $\beta$  for 5 days. **(B)** IFN- $\gamma$  and IL-17A production by 2W1S<sup>+</sup> CD4<sup>+</sup> T cells after stimulation under Th17 polarization conditions for 5 days. Each point reflects the data from a single mouse, and results representative of two independent experiments each with similar results are shown. Bar, mean  $\pm$  one standard error.
